# Supplementary material for: Status of hospital-based blood transfusion services in low-income and middle-income countries: a cross-sectional international survey
Source: HighWire-hosted journal article supplement (doi:10.1136/bmjopen-2021-055017), 2022-02-01
Supplement: bmjopen-2021-055017supp001_data_supplement.pdf [file bmjopen-2021-055017supp001_data_supplement.pdf]

---

**Supplement: Topic areas and survey questions**

The survey employed multiple-choice, best-choice, Likert-type responses, categorical selections, open-ended questions, or quantification. The survey questions conformed with the Flesch–Kincaid readability test to maximize comprehension, evaluated for skip-patterns and logic flows and met accessibility standards for access on multiple platforms (smartphone, browser, desktop, tablet). Completion time for the survey respondents was approximately 14 minutes. The survey was made available in English, Spanish, French, and Russian.

---

**Facility Description**

- Does the facility where you work perform blood transfusion?
- What is the typical number of inpatient beds at your facility?
- How many patients are typically admitted into your facility each day?
- Please tell us the total number of blood products transfused at your facility in 2019.
- Which of the following best describes the setting of the facility where you work?
- In what city or town is the facility where you work?
- In which country is the facility where you work?
- Which of the following best describes your facility?
- Is your facility a teaching hospital?

**Immunohematology Methods**

- What is the primary method used to determine ABO/Rh?
- What is the primary method used to screen for antibodies in the patient?
- What is the primary method used to identify antibodies in the patient?
- When is a crossmatch test performed to determine the compatibility of the Whole Blood or Red Blood Cells transfusion?
- What is the primary technique used when performing a Crossmatch?
- What is the role of the respondent?

**Blood Product**

- What types of Blood Products are available at your facility?
- What types of modifications are available?
- Please indicate if these platelet products are available in your facility?

**Blood Supply**

- At the facility where you work, where does your blood supply come from?
- How much of your blood supply is collected from INSIDE (or within) the organization?
- For blood collected within your facility, how are donors recruited?

**Special Procedures**

- Does your facility have a written procedure for emergency transfusion situations to rapidly get blood products to a patient?
- When do you use the emergency transfusion procedure at your facility?
- At your facility, are clinical staff members REQUIRED to report suspected blood transfusion adverse events for laboratory evaluation?
- What types of adverse events are REQUIRED to be reported at INSIDE your facility?
- Are there any perceived barriers to reporting adverse events at your facility?
- Is your facility REQUIRED to report adverse transfusion events to an OUTSIDE organization (e.g., national hemovigilance program)?
- Which events is your facility required to report externally (OUTSIDE of the organization)?

**Blood Transfusion Policies**

- Within your organization, do you have written blood transfusion policies?
- Please indicate what is included in your blood transfusion policies?
- Within your organization, how is blood transfusion policy established?

**Leadership & Oversight**

- Tell us about the educational background of the person who leads the transfusion service/blood bank at your facility?
- Does your facility have a committee that meets to specifically oversee blood transfusion policy, procedure, and/or guidelines?
- How often did the committee that oversees blood transfusions meet last year?
- Who typically participates on the committee that oversees blood transfusion at your organization?

How often are educational courses on blood transfusion offered at your organization?

**Blood Availability**

In the last 30 days, was there any time when blood was ordered for a patient transfusion, but it was not available for transfusion within 24 hours?

At your organization, what were the most common reasons that blood was ordered, but it was not available for transfusion within 24 hours?

**Barriers**

What is the top barrier to safe, available blood transfusion, in your experience (select the most significant barrier)?

Please share any additional thoughts or comments you may have about improving safe, available blood transfusion (free text).
